# Supplementary material for: Unusually slow intramolecular proton transfer dynamics of 4′-N,N-dimethylamino-3-hydroxyflavone in high n-alcohols: involvement of solvent relaxation
Source: Royal Society of Chemistry journal article supplement (doi:10.1039/c5pp00377f), 2016-01-08

## Supplementary Information

on

### Unusually Slow Intramolecular Proton Transfer Dynamics of 4'-N,N-Dimethylamino-3-Hydroxyflavone in High n-Alcohols : Involvement of Solvent Relaxation

**Deborin Ghosh<sup>a</sup>, Shaikh Batuta<sup>b</sup>,  
Naznin Ara Begum<sup>b</sup>, Debabrata Mandal<sup>a\*</sup>**

<sup>a</sup> Department of Chemistry, University College of Science & Technology,  
University of Calcutta, 92, A.P.C. Road, Kolkata 700 009, India

**E-Mail: [dmandal.chemistry@gmail.com](mailto:dmandal.chemistry@gmail.com)**

<sup>b</sup> Bio-Organic Chemistry Lab, Department of Chemistry, Visva-Bharati University,  
Santiniketan 731 235, India

**Table ST1:** Fitting parameters for fluorescence time-profiles of DMA3HF at different emission wavelengths in the three n-alcohols ( $\lambda_{\text{ex}} = 375 \text{ nm}$ )

| solvent   | $\lambda_{\text{em}}$<br>(nm) | $\tau_1$<br>(ns) | $a_1$<br>(%) | $\tau_2$<br>(ns) | $a_2$<br>(%) | $\tau_3$<br>(ns) | $a_3$<br>(%) | $\tau_4$<br>(ns) | $a_4$<br>(%) |
|-----------|-------------------------------|------------------|--------------|------------------|--------------|------------------|--------------|------------------|--------------|
| 1-Butanol | 400                           | 0.07             | 99           | 0.44             | 1            | -                | -            | -                | -            |
|           | 420                           | 0.08             | 95           | 0.30             | 4            | 1.92             | 1            | -                | -            |
|           | 440                           | 0.08             | 91           | 0.24             | 6            | 1.89             | 3            | -                | -            |
|           | 450                           | 0.09             | 90           | 0.28             | 4            | 1.89             | 6            | -                | -            |
|           | 460                           | 0.11             | 89           | 1.89             | 11           | -                | -            | -                | -            |
|           | 470                           | 0.12             | 82           | 1.93             | 18           | -                | -            | -                | -            |
|           | 480                           | 0.13             | 71           | 1.96             | 29           | -                | -            | -                | -            |
|           | 490                           | 0.07             | -19          | 0.13             | 51           | 1.97             | 30           | -                | -            |
|           | 500                           | 0.06             | -21          | 0.14             | 36           | 1.99             | 43           | -                | -            |
|           | 515                           | 0.06             | -36          | 0.15             | 13           | 1.99             | 51           | -                | -            |
|           | 525                           | 0.06             | -41          | 0.15             | 7            | 1.99             | 52           | -                | -            |
|           | 535                           | 0.07             | -42          | 0.17             | 6            | 1.99             | 52           | -                | -            |
|           | 545                           | 0.08             | -43          | 0.45             | 7            | 1.99             | 50           | -                | -            |
|           | 552                           | 0.08             | -42          | 0.45             | 12           | 2.00             | 46           | -                | -            |
|           | 570                           | 0.09             | -41          | 0.45             | 20           | 2.00             | 39           | -                | -            |
|           | 590                           | 0.09             | -38          | 0.45             | 23           | 1.99             | 39           | -                | -            |
|           | 620                           | 0.09             | -39          | 0.45             | 24           | 1.99             | 37           | -                | -            |
| 650       | 0.10                          | -36              | 0.45         | 24               | 1.99         | 40               | -            | -                |              |
| 1-Hexanol | 450                           | 0.11             | 91           | 0.68             | 5            | 2.48             | 4            | -                | -            |
|           | 460                           | 0.13             | 85           | 0.57             | 6            | 2.19             | 9            | -                | -            |
|           | 470                           | 0.15             | 80           | 0.72             | 5            | 2.10             | 15           | -                | -            |
|           | 480                           | 0.06             | -19          | 0.18             | 60           | 1.98             | 21           | -                | -            |
|           | 490                           | 0.06             | -31          | 0.21             | 42           | 2.00             | 27           | -                | -            |
|           | 500                           | 0.06             | -31          | 0.25             | 33           | 2.03             | 36           | -                | -            |
|           | 511                           | 0.08             | -33          | 0.24             | 22           | 2.03             | 45           | -                | -            |

(continued to next page)....

.....(continued from previous page)

| solvent   | $\lambda_{em}$<br>(nm) | $\tau_1$<br>(ns) | $a_1$<br>(%) | $\tau_2$<br>(ns) | $a_2$<br>(%) | $\tau_3$<br>(ns) | $a_3$<br>(%) | $\tau_4$<br>(ns) | $a_4$<br>(%) |
|-----------|------------------------|------------------|--------------|------------------|--------------|------------------|--------------|------------------|--------------|
| 1-Hexanol | 520                    | 0.08             | -37          | 0.23             | 13           | 2.03             | 50           | -                | -            |
|           | 530                    | 0.08             | -41          | 0.79             | 6            | 2.06             | 53           | -                | -            |
|           | 540                    | 0.10             | -41          | 0.80             | 7            | 2.05             | 52           | -                | -            |
|           | 552                    | 0.10             | -42          | 0.80             | 13           | 2.06             | 45           | -                | -            |
|           | 570                    | 0.10             | -41          | 0.80             | 18           | 2.05             | 41           | -                | -            |
|           | 590                    | 0.10             | -40          | 0.80             | 21           | 2.05             | 39           | -                | -            |
|           | 620                    | 0.09             | -39          | 0.79             | 21           | 2.05             | 40           | -                | -            |
|           | 650                    | 0.10             | -34          | 0.79             | 22           | 2.05             | 44           | -                | -            |
| 1-Decanol | 400                    | 0.08             | 92           | 0.27             | 8            | -                | -            | -                | -            |
|           | 420                    | 0.11             | 93           | 0.53             | 7            | -                | -            | -                | -            |
|           | 440                    | 0.14             | 89           | 0.57             | 9            | 2.23             | 2            | -                | -            |
|           | 450                    | 0.16             | 84           | 0.61             | 12           | 2.06             | 4            | -                | -            |
|           | 460                    | 0.20             | 77           | 0.68             | 15           | 2.08             | 8            | -                | -            |
|           | 470                    | 0.07             | -18          | 0.18             | 53           | 0.56             | 18           | 1.99             | 11           |
|           | 480                    | 0.07             | -29          | 0.20             | 39           | 0.63             | 18           | 2.06             | 14           |
|           | 490                    | 0.06             | -31          | 0.39             | 42           | 1.99             | 27           | -                | -            |
|           | 498                    | 0.06             | -35          | 0.43             | 31           | 2.02             | 34           | -                | -            |
|           | 510                    | 0.06             | -36          | 0.51             | 16           | 2.07             | 48           | -                | -            |
|           | 520                    | 0.09             | -37          | 0.46             | 7            | 2.06             | 56           | -                | -            |
|           | 530                    | 0.11             | -39          | 0.40             | 2            | 2.02             | 59           | -                | -            |
|           | 540                    | 0.12             | -39          | 1.10             | 11           | 2.04             | 50           | -                | -            |
|           | 552                    | 0.14             | -38          | 1.11             | 23           | 2.07             | 39           | -                | -            |
|           | 570                    | 0.15             | -36          | 1.09             | 30           | 2.05             | 34           | -                | -            |
|           | 590                    | 0.13             | -36          | 1.12             | 33           | 2.05             | 31           | -                | -            |
|           | 620                    | 0.11             | -35          | 1.13             | 36           | 2.07             | 29           | -                | -            |
| 650       | 0.08                   | -38              | 0.98         | 30               | 2.01         | 32               | -            | -                |              |

**Table ST2:** Fitting parameters for fluorescence time-profiles of DMA3MeF at different emission wavelengths in the three n-alcohols ( $\lambda_{\text{ex}} = 375 \text{ nm}$ )

| solvent   | $\lambda_{\text{em}}$<br>(nm) | $\tau_1$<br>(ns) | $a_1$<br>(%) | $\tau_2$<br>(ns) | $a_2$<br>(%) | $\tau_3$<br>(ns) | $a_3$<br>(%) | $\tau_4$<br>(ns) | $a_4$<br>(%) |
|-----------|-------------------------------|------------------|--------------|------------------|--------------|------------------|--------------|------------------|--------------|
| 1-Butanol | 400                           | 0.07             | 97           | 0.36             | 2            | 2.35             | 1            | -                | -            |
|           | 410                           | 0.08             | 97           | 0.36             | 2            | 2.34             | 1            | -                | -            |
|           | 420                           | 0.08             | 97           | 0.36             | 2            | 2.45             | 1            | -                | -            |
|           | 430                           | 0.09             | 96           | 0.35             | 2            | 2.52             | 2            | -                | -            |
|           | 450                           | 0.12             | 92           | 0.92             | 1            | 2.67             | 7            | -                | -            |
|           | 470                           | <0.06            | -30          | 0.14             | 57           | 2.63             | 13           | -                | -            |
|           | 485                           | <0.06            | -45          | 0.17             | 35           | 2.66             | 20           | -                | -            |
|           | 503                           | <0.06            | -46          | 0.25             | 18           | 2.69             | 36           | -                | -            |
|           | 515                           | 0.07             | -50          | 0.45             | 8            | 2.73             | 43           | -                | -            |
|           | 530                           | 0.09             | -52          | 1.39             | 6            | 2.79             | 43           | -                | -            |
|           | 560                           | 0.14             | -50          | 2.08             | 11           | 2.79             | 39           | -                | -            |
|           | 590                           | 0.16             | -50          | 2.63             | 50           | -                | -            | -                | -            |
|           | 620                           | 0.18             | -50          | 2.62             | 50           | -                | -            | -                | -            |
| 1-Hexanol | 400                           | 0.08             | 96           | 0.38             | 3            | 2.65             | 1            | -                | -            |
|           | 410                           | 0.09             | 95           | 0.38             | 4            | 2.68             | 1            | -                | -            |
|           | 420                           | 0.11             | 96           | 0.45             | 3            | 2.68             | 1            | -                | -            |
|           | 430                           | 0.12             | 93           | 0.45             | 5            | 2.64             | 2            | -                | -            |
|           | 450                           | <0.06            | -55          | 0.15             | 39           | 0.48             | 3            | 2.52             | 3            |
|           | 465                           | <0.06            | -57          | 0.19             | 35           | 0.76             | 3            | 2.65             | 5            |
|           | 480                           | <0.06            | -55          | 0.25             | 31           | 1.40             | 3            | 2.72             | 11           |
|           | 500                           | 0.07             | -47          | 0.30             | 19           | 1.70             | 11           | 2.82             | 23           |
|           | 515                           | 0.08             | -50          | 1.52             | 14           | 2.78             | 36           | -                | -            |
|           | 530                           | 0.14             | -45          | 1.98             | 21           | 2.83             | 34           | -                | -            |
|           | 560                           | 0.22             | -46          | 2.12             | 22           | 2.78             | 32           | -                | -            |
|           | 590                           | 0.25             | -50          | 2.53             | 50           | -                | -            | -                | -            |
|           | 620                           | 0.29             | -50          | 2.53             | 50           | -                | -            | -                | -            |

(continued to next page)....

.....(continued from previous page)

| solvent   | $\lambda_{em}$<br>(nm) | $\tau_1$<br>(ns) | $a_1$<br>(%) | $\tau_2$<br>(ns) | $a_2$<br>(%) | $\tau_3$<br>(ns) | $a_3$<br>(%) | $\tau_4$<br>(ns) | $a_4$<br>(%) |
|-----------|------------------------|------------------|--------------|------------------|--------------|------------------|--------------|------------------|--------------|
| 1-Decanol | 400                    | 0.13             | 86           | 0.41             | 13           | 2.39             | 1            | -                | -            |
|           | 410                    | 0.17             | 85           | 0.50             | 14           | 2.54             | 1            | -                | -            |
|           | 425                    | <0.06            | -50          | 0.19             | 37           | 0.52             | 12           | 2.34             | 1            |
|           | 440                    | <0.06            | -50          | 0.23             | 32           | 0.60             | 16           | 2.68             | 2            |
|           | 455                    | <0.06            | -36          | 0.36             | 39           | 0.84             | 19           | 2.89             | 6            |
|           | 470                    | 0.06             | -40          | 0.58             | 37           | 1.34             | 12           | 3.13             | 11           |
|           | 489                    | <0.06            | -24          | 0.16             | -24          | 1.01             | 26           | 3.02             | 26           |
|           | 510                    | 0.07             | -26          | 0.31             | -25          | 1.94             | 20           | 3.22             | 29           |
|           | 530                    | 0.09             | -21          | 0.54             | -31          | 2.57             | 26           | 3.20             | 22           |
|           | 560                    | 0.14             | -9           | 0.72             | -38          | 2.87             | 53           | -                | -            |
|           | 590                    | 0.11             | -5           | 0.80             | -43          | 2.85             | 52           | -                | -            |
|           | 620                    | 0.06             | -5           | 0.86             | -44          | 2.85             | 51           | -                | -            |

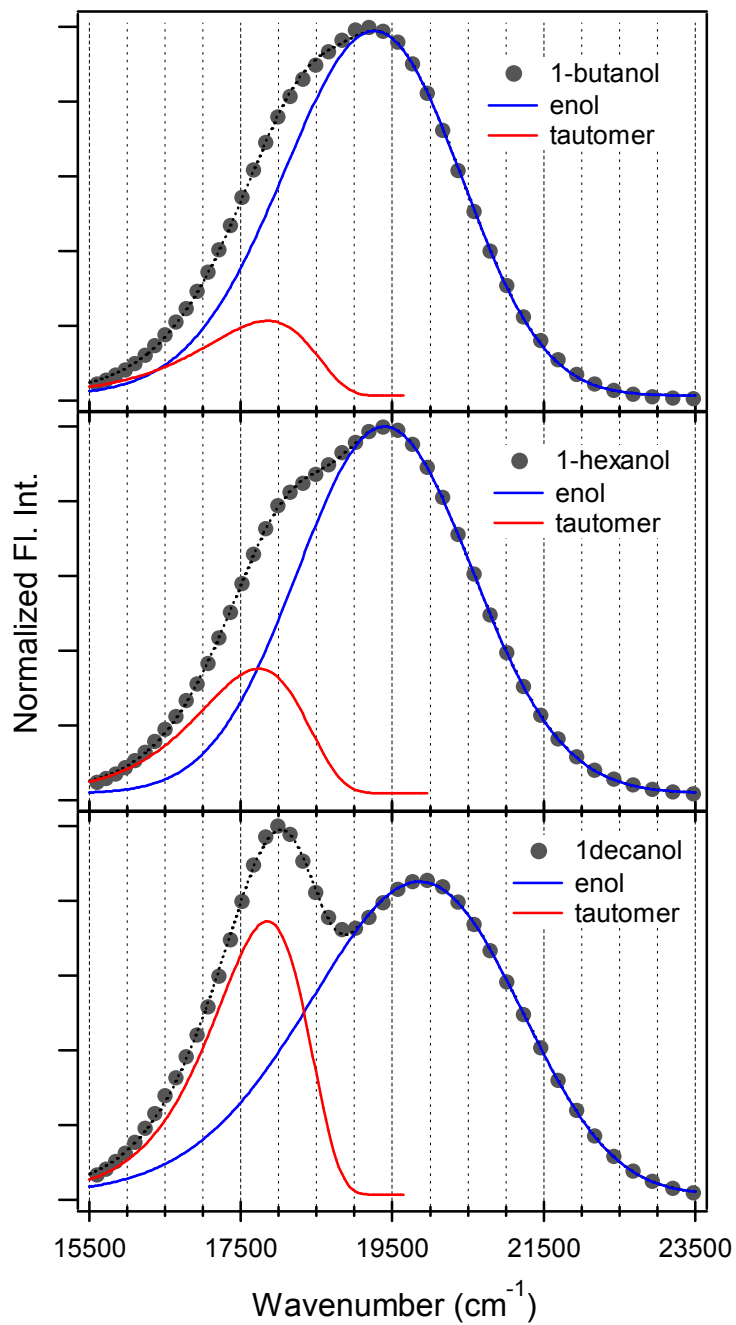

**Fig. SF1:** Normalized fluorescence emission spectra of DMA3HF in different n-alcohols ( $\lambda_{\text{ex}} = 375$  nm), plotted as a function of emission energy. The component E\* (enol) and T\* (tautomer) peaks resolved by lognormal deconvolution are also shown.

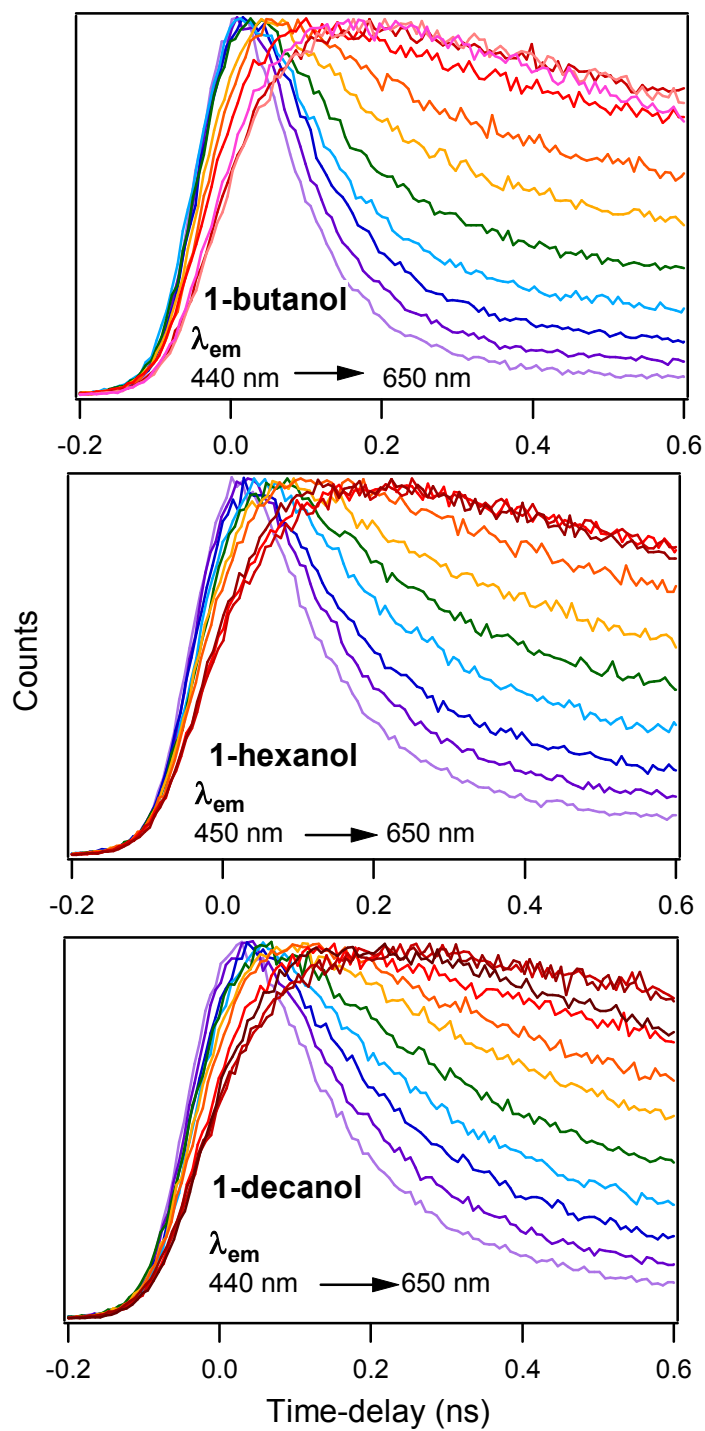

**Fig. SF2:** Fluorescence time-profiles of DMA3HF in 1-butanol, 1-hexanol & 1-decanol at short time-delays with  $\lambda_{ex} = 375$  nm.

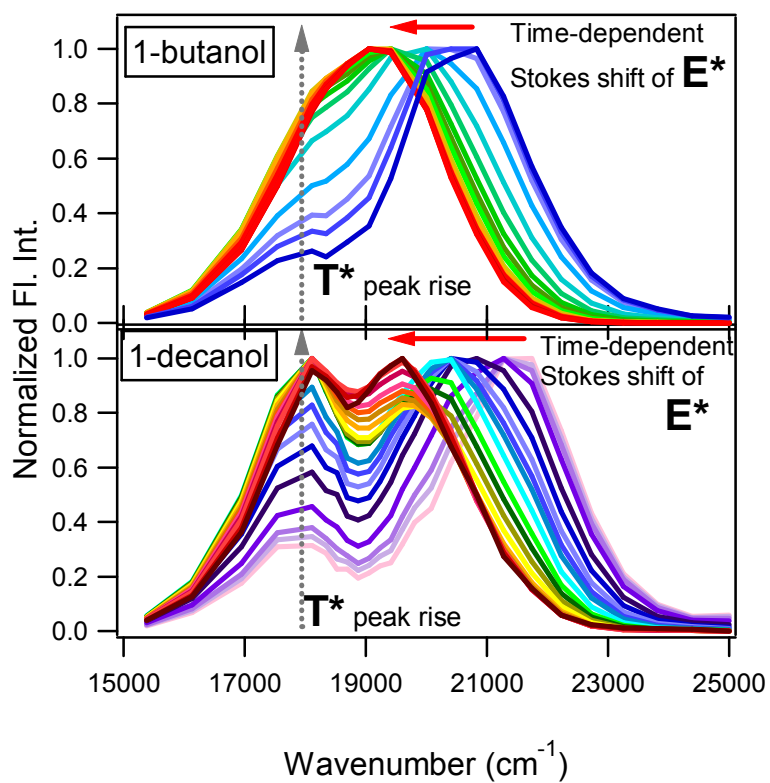

**Fig.SF3:** Normalized TRES of DMA3HF in 1-butanol and 1-decanol at various time-delays. E\* emission peak undergoes time-dependent Stokes shift as indicated, while the T\* peak remains static at  $\sim 18000 \text{ cm}^{-1}$ , but gains in intensity with passage of time (blue curves to red curves).



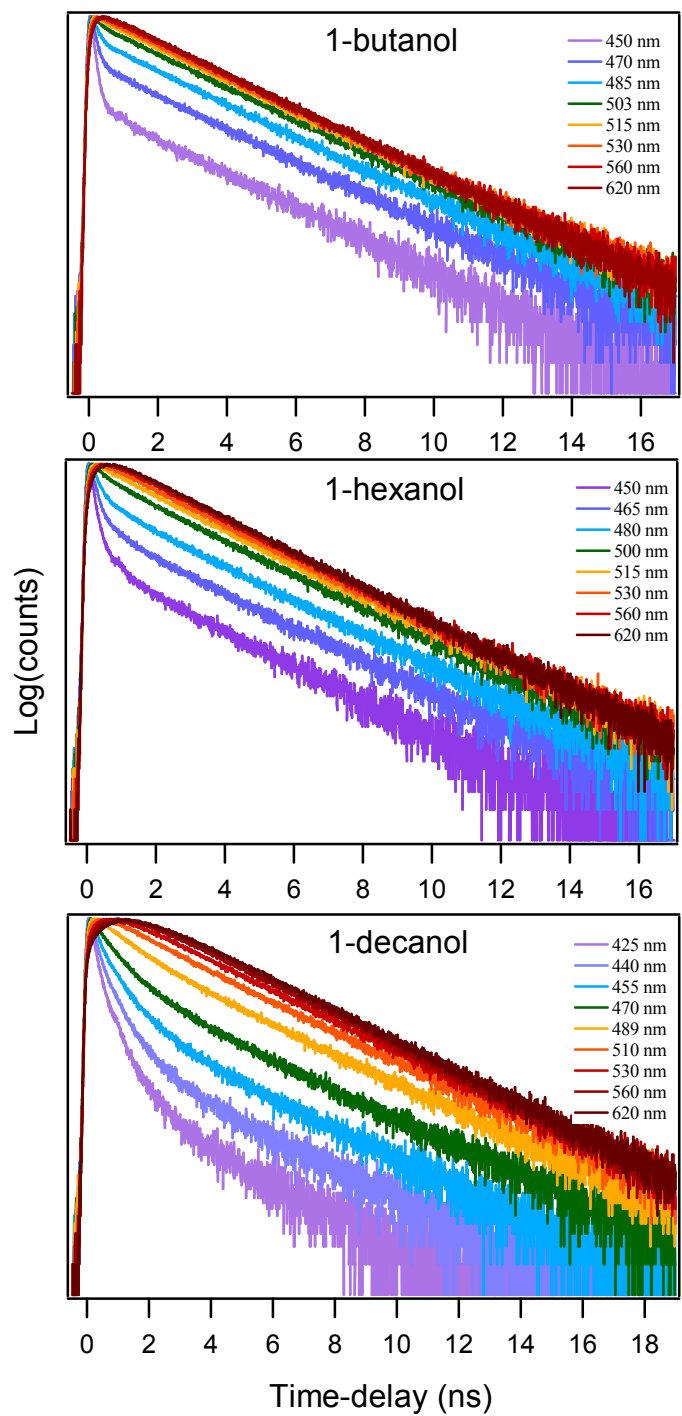

**Fig. SF4:** Fluorescence time-profiles of DMA3MeF in 1-butanol, 1-hexanol & 1-decanol at various emission wavelengths (as indicated) when excited at  $\lambda_{\text{ex}} = 375$  nm.

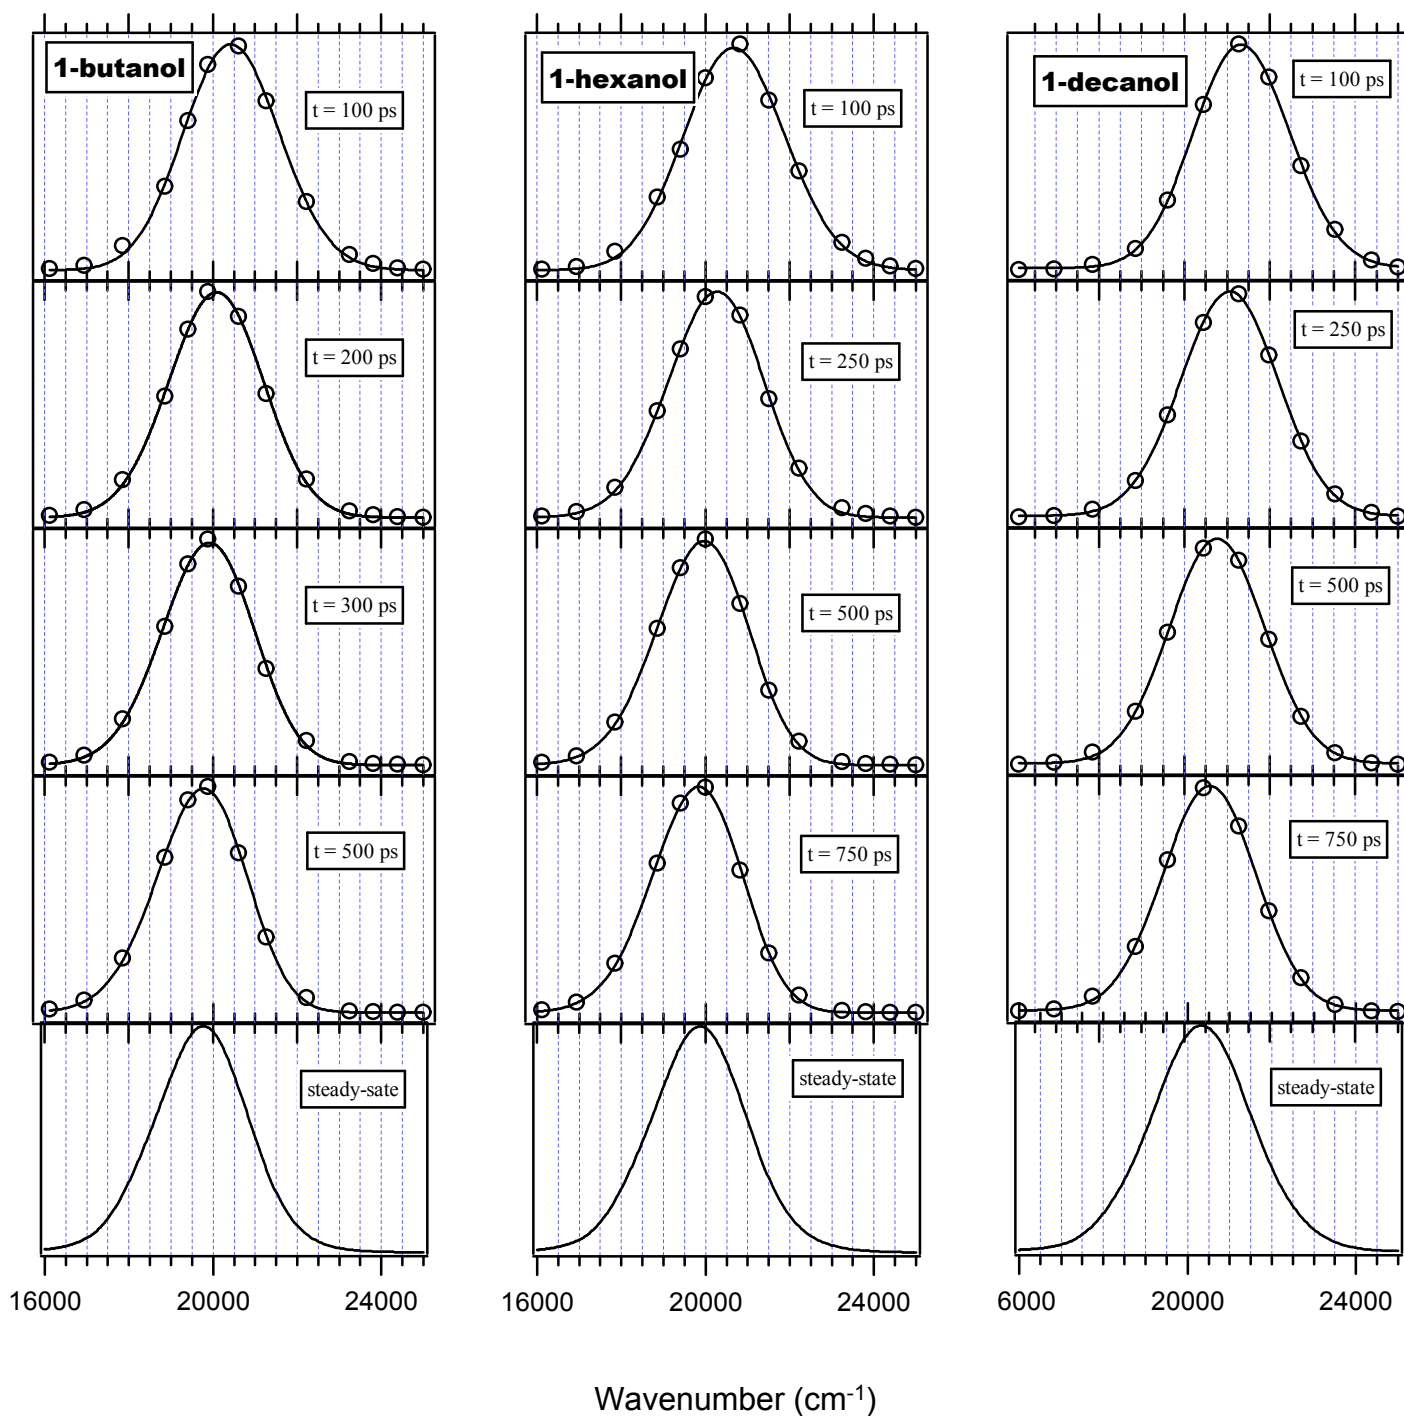

**Fig. SF5:** TRES of DMA3MeF in high n-alcohols at various time-delays as indicated. Circles represent the calculated intensities  $I(\nu_{em}=\nu', t=t')$  at a given emission wavenumber  $\nu_{em}$  and given time-delay  $t=t'$ , while solid curves represent the double lognormal fit to these intensities.

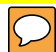

Supplement: c5pp00377f1.pdf [file c5pp00377f1.pdf]
